# Supplementary material
Source: PubMed Central journal article supplement (PMC9328111)
Supplement: NIHMS1818883-supplement-1.pdf [file NIHMS1818883-supplement-1.pdf]

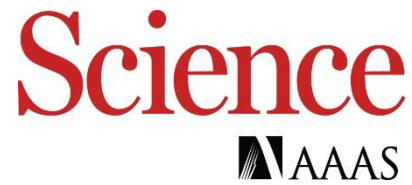

## Supplementary Materials for

### **TNF induces pathogenic mitochondrial ROS in tuberculosis through reverse electron transport**

Francisco J. Roca<sup>1,4</sup>, Laura J. Whitworth<sup>1,2</sup>, Hiran A. Prag<sup>3</sup>, Michael P. Murphy<sup>1,3</sup> and Lalita Ramakrishnan<sup>1,2,\*</sup>

Correspondence to: [lalitar@mrc-lmb.cam.ac.uk](mailto:lalitar@mrc-lmb.cam.ac.uk)

#### **This PDF file includes:**

Figs. S1 to S5  
Tables S1 to S2  
Captions for Data S1

#### **Other Supplementary Materials for this manuscript include the following:**

Data S1 (Excel file)

Figure S1

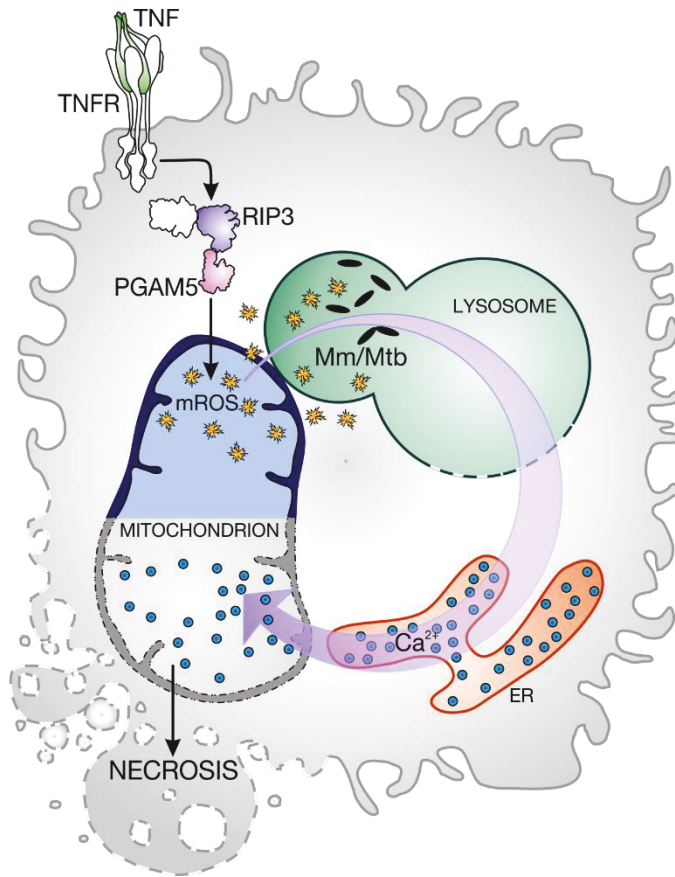

**Figure S1.**

**Excess TNF induces mROS and necrosis of mycobacterium-infected macrophages.**

Simplified illustration of the necrosis pathway triggered by excess TNF. Mm, *Mycobacterium marinum*; Mtb, *M. tuberculosis*; ER, endoplasmic reticulum; Ca<sup>2+</sup>, calcium.

Figure S2

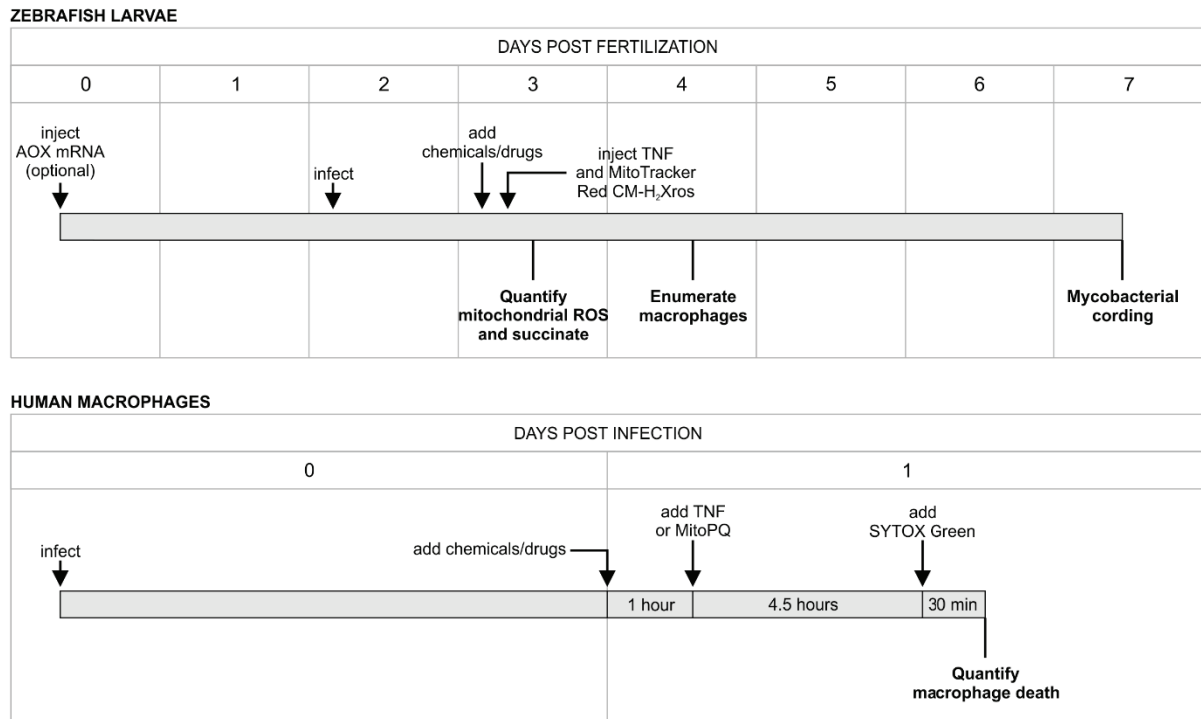

**Fig. S2.**

**Diagram showing the experimental design used in the study in zebrafish larvae and human macrophages.**

AOX mRNA, messenger RNA for alternative oxidase from *Ciona intestinalis*; MitoPQ, MitoParaquat. See Materials and Methods for more details about route and time of administration of chemicals, drugs, and TNF in zebrafish larvae.

Figure S3

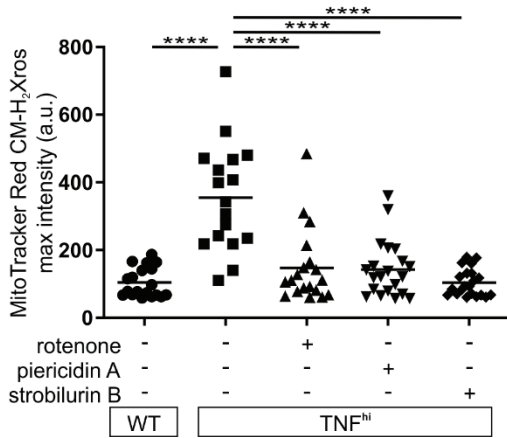

**Fig. S3.**  
**Complex I inhibitors with different mechanisms of action reduce mROS in TNF-high conditions.**

Quantification of mROS 1 dpi with Mm in larvae that are wild-type (WT) or TNF<sup>hi</sup> treated with rotenone, piericidin A, strobilurin B, or vehicle. Horizontal bars represent means; \*\*\*\* $P < 0.0001$  (one-way ANOVA with Tukey's post-test). Representative of two independent experiments.

Figure S4

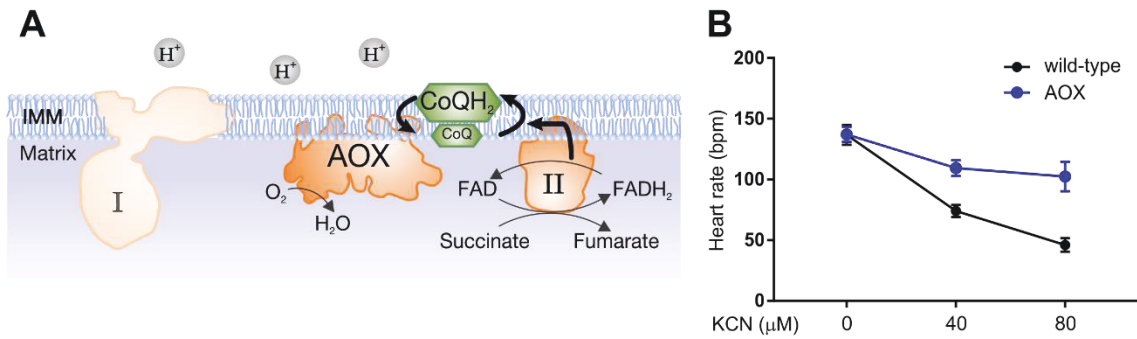

**Fig. S4.**

**AOX-expressing zebrafish larvae are resistant to inhibition of complex IV by cyanide.**

(A) Illustration demonstrating how AOX expression decreases the CoQH<sub>2</sub> pool and prevents RET mROS production at complex I. Compare with Fig. 2B. AOX, alternative oxidase; IMM, inner mitochondrial membrane; I-II, complexes. (B) Comparison of heart rate (beats per minute) in 3 dpf wild-type or AOX-expressing animals treated with KCN or vehicle.  $P < 0.0001$  (two-way ANOVA).

Figure S5

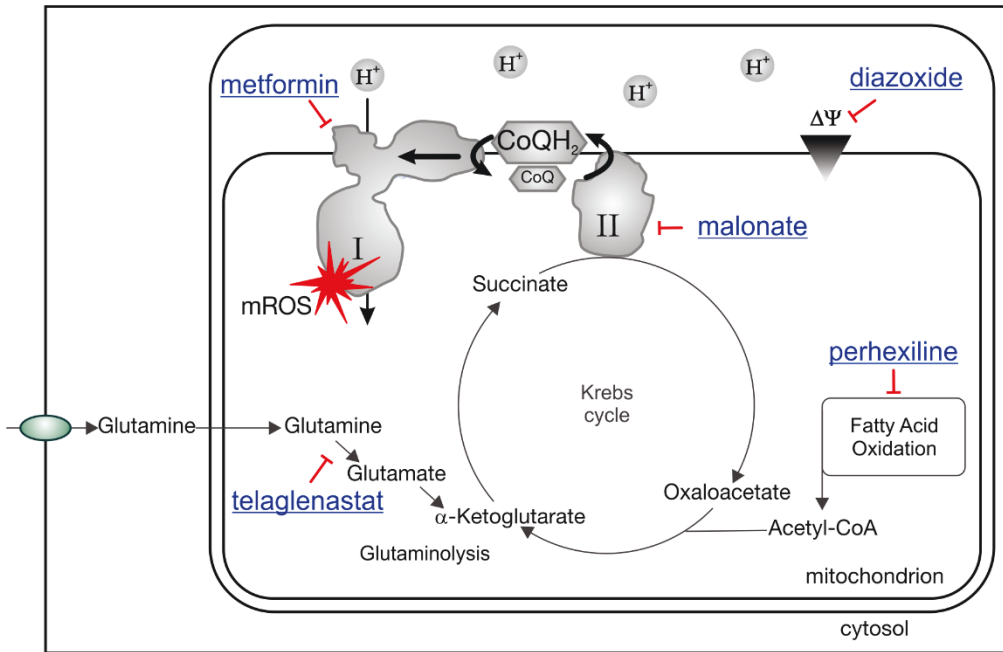

**Figure S5.**

**Currently available drugs can intercept TNF-induced mROS production and inhibit necrosis of mycobacterium-infected macrophages.**

Schematic diagram showing the new druggable targets identified in this work to inhibit TNF-elicited RET mROS and necrosis of mycobacterium-infected macrophages. Blue underlined, drugs; red blunted arrows, inhibition.

| Compound                                                              | Mechanism of action                                                | Human Drug?                                                                          |
|-----------------------------------------------------------------------|--------------------------------------------------------------------|--------------------------------------------------------------------------------------|
| <b>Modulators of CI</b>                                               |                                                                    |                                                                                      |
| Rotenone                                                              | Inhibitor of complex I (12, 14)                                    | No. Plaguicide in agriculture (39)                                                   |
| Piericidin A                                                          | Inhibitor of complex I (14)                                        | No. Laboratory reagent                                                               |
| Strobilurin B                                                         | Inhibitor of complex I (14)                                        | No. Fungicide in agriculture (40)                                                    |
| Metformin                                                             | Inhibitor of complex I (15)                                        | Yes, oral, anti-diabetic (41, 42)                                                    |
| Phenformin                                                            | Inhibitor of complex I (15)                                        | No. Withdrawn from clinical use (41)                                                 |
| <b>Modulators of CII</b>                                              |                                                                    |                                                                                      |
| TTFA (thenoyltrifluoroacetone)                                        | Inhibitor of complex II (43)                                       | No. Laboratory reagent                                                               |
| Atpenin A5                                                            | Inhibitor of complex II (44)                                       | No. Laboratory reagent                                                               |
| DM-malonate (dimethyl malonate) as a source of the inhibitor malonate | Inhibitor of complex II (19)                                       | Pro-drug shown to prevent ischemia-reperfusion injury in models of heart attack (28) |
| <b>Mitochondrial uncouplers</b>                                       |                                                                    |                                                                                      |
| FCCP (Carbonyl cyanide-4-(trifluoromethoxy)phenylhydrazone)           | Protonophore (15)                                                  | No. Laboratory reagent                                                               |
| DNP (2,4-dinitrophenol)                                               | Protonophore (45)                                                  | No. Laboratory reagent                                                               |
| Nigericin                                                             | Ionophore, K <sup>+</sup> /H <sup>+</sup> exchanger (15)           | No. Laboratory reagent                                                               |
| Diazoxide                                                             | Activator of ATP-sensitive potassium channels (KATP channels) (46) | Yes, oral, for hyperinsulinemic hypoglycemia (47)                                    |
| <b>Modulators of glycolysis</b>                                       |                                                                    |                                                                                      |
| UK5099                                                                | Inhibitor of the mitochondrial pyruvate carrier (48)               | No. Laboratory reagent                                                               |
| <b>Modulators of FAO</b>                                              |                                                                    |                                                                                      |
| Perhexiline                                                           | Inhibitor of CPT1/2 (49)                                           | Yes, oral, antianginal (50)                                                          |
| 4-BrCA (4-Bromocrotonic acid)                                         | Inhibitor of 3-ketoacyl-CoA thiolase (KAT) (51)                    | No. Laboratory reagent                                                               |
| <b>Modulators of glutaminolysis</b>                                   |                                                                    |                                                                                      |
| GPNA (L-γ-Glutamyl-p-nitroanilide)                                    | Inhibitor of SLC1A5 (Gln transporter) (52)                         | No. Laboratory reagent                                                               |
| BPTES                                                                 | Inhibitor of glutaminase 1 (GLS1) (52)                             | No. Laboratory reagent                                                               |
| Telaglenastat (CB-839)                                                | Inhibitor of glutaminase 1 (GLS1) (52)                             | Yes, oral, In clinical trials for cancer (53)                                        |
| R-162                                                                 | Inhibitor of GDH1 (54)                                             | No. Laboratory reagent                                                               |
| <b>TCA intermediates and modulators of TCA</b>                        |                                                                    |                                                                                      |
| Methyl pyruvate (M-pyruvate)                                          | Cell permeable source of pyruvate (55)                             | No. Laboratory reagent                                                               |
| Diethyl succinate                                                     | Cell permeable source of succinate (19)                            | No. Laboratory reagent                                                               |
| DEBM (diethyl butyl malonate)                                         | Inhibitor of the mitochondrial succinate/malate antiporter (19)    | No. Laboratory reagent                                                               |

|                                   |                                                                                                                   |                                                    |
|-----------------------------------|-------------------------------------------------------------------------------------------------------------------|----------------------------------------------------|
| Dimethyl glutamate (DM-glutamate) | Cell permeable source of glutamate (56)                                                                           | No. Laboratory reagent                             |
| <b>Others</b>                     |                                                                                                                   |                                                    |
| MitoParaquat (MitoPQ)             | Mitochondria-targeted redox cyclers that produce superoxide by redox cycling at the flavin site of complex I (57) | No. Paraquat used as herbicide in agriculture (58) |

**Table S1.**  
**Small molecules used in the study.**



| Compound             | Concentration used (tested) | Toxic effects observed                                                                                                                                                                          |
|----------------------|-----------------------------|-------------------------------------------------------------------------------------------------------------------------------------------------------------------------------------------------|
| Rotenone             | 6.25 (6.25-100) nM          | Death 24 hours post administration with concentrations > 12.5 nM                                                                                                                                |
| Piericidin A         | 50 (5-500) nM               | Necrotic tissues 24 hours post administration with concentrations > 50 nM                                                                                                                       |
| Strobilurin B        | 100 (5-500) nM              | Slow heart rate 24 hours post administration with concentrations > 100 nM                                                                                                                       |
| Metformin            | 20 (1-40) $\mu$ M           | Death 24 hours post administration with 40 $\mu$ M. No toxic effects observed with 20 $\mu$ M over 4 days                                                                                       |
| Phenformin           | 20 (1-40) $\mu$ M           | Gray yolk 24 hours post administration with 40 $\mu$ M. No toxic effects observed with 20 $\mu$ M over 4 days                                                                                   |
| TTFA                 | 1 (0.25-20) $\mu$ M         | Death 24 hours post administration with 5 $\mu$ M. Curved spines in some larvae 24 hours post administration with 1 $\mu$ M                                                                     |
| Atpenin A5           | 2.5 (2.5-1000) nM           | Necrotic tissues 24 hours post administration with concentrations >2.5 nM and up to 25 nM. Death 4 hours post administration with concentrations >25 nM                                         |
| dimethyl malonate    | 10 (1-100) $\mu$ M          | No toxic effects observed for any of the concentrations tested 24 hours post administration. No toxic effects observed with 10 $\mu$ M over 4 days (not tested for other concentrations)        |
| FCCP                 | 50 (50-500) nM              | Necrotic tissues observed in 2 hours with 200 nM. Necrotic tissues 24 hours post administration with 50 nM                                                                                      |
| 2,4-dinitrophenol    | 100 (10-1000) nM            | Necrotic tissues 24 hours post administration with concentrations >500 nM                                                                                                                       |
| Nigericin            | 5 (0.05-5) $\mu$ M          | Death 24 hours post administration with 5 $\mu$ M                                                                                                                                               |
| Diazoxide            | 50 (12.5-2500) nM           | No toxic effects observed for any of the concentrations tested 24 hours post administration. No toxic effects observed with 50 nM over a period of 4 days (not tested for other concentrations) |
| UK5099               | 10 (1-50) $\mu$ M           | Gray yolk and edema 24 hours post administration with concentrations >10 $\mu$ M                                                                                                                |
| Perhexiline          | 10 (0.01-10) $\mu$ M        | No toxic effects observed for the concentrations tested over 4 days                                                                                                                             |
| 4-Bromocrotonic acid | 10 (1-20) $\mu$ M           | No toxic effects observed for the concentrations tested 24 hours post administration                                                                                                            |
| GPNA                 | 10 (0.1-100) $\mu$ M        | No toxic effects observed for the concentrations tested 24 hours post administration                                                                                                            |
| BPTES                | 5 (2-5) $\mu$ M             | No toxic effects observed for the concentrations tested over 4 days                                                                                                                             |
| Telaglenastat        | 5 (0.5-5) $\mu$ M           | No toxic effects observed for the concentrations tested over 4 days                                                                                                                             |
| R-162                | 1 (0.1-1) $\mu$ M           | No toxic effects observed for the concentrations tested over 4 days                                                                                                                             |

**Table S2.**  
**Toxic effects observed in zebrafish larvae after pharmacological interventions.**

**Data S1. (separate Excel file)**

**Raw data and summary of the analysis for the experiments showed in Fig. 5, A and B.**

Data S1

|                     | uninfected-WT | Mm-WT   | uninfected-TNF | Mm-TNF <sup>hi</sup> | Mm-TNF <sup>hi</sup> -GPNA | Mm-TNF <sup>hi</sup> -BPTES |
|---------------------|---------------|---------|----------------|----------------------|----------------------------|-----------------------------|
| <b>EXPERIMENT 1</b> | 10.19964      | 12.5342 | 11.56649       | 15.87831             | 8.191469                   | 9.621429                    |
|                     | 10.25871      | 10.9107 | 8.89771        | 12.96664             | 9.186496                   | 9.006775                    |
|                     | 12.23304      | 13.3213 | 9.377055       | 11.00655             | 9.754825                   | 9.513851                    |
|                     | 10.55048      | 11.1403 | 10.29649       | 12.59976             | 9.928756                   | 7.913414                    |
|                     | 10.75182      | 10.9969 | 8.885279       | 11.56042             | 10.32894                   | 8.876832                    |
| <b>EXPERIMENT 2</b> | 8.266625      | 9.94793 | 8.52337        | 11.64261             | 8.416775                   | 11.22308                    |
|                     | 8.31334       | 9.34203 | 9.81538        | 10.46372             | 7.693635                   | 9.48613                     |
|                     | 8.65511       | 9.42176 | 9.01085        | 10.15769             | 8.581375                   | 11.09407                    |
|                     | 7.471995      | 9.06886 | 8.863855       | 9.744265             |                            | 12.00439                    |
|                     | 10.55495      | 8.39195 | 9.79467        | 12.70169             |                            |                             |
| <b>EXPERIMENT 3</b> | 8.844005      | 9.2075  | 8.69321        | 13.26537             |                            |                             |
|                     | 9.669373      | 11.9157 | 10.60354       | 11.69141             | 10.28906                   | 9.950385                    |
|                     | 9.28354       | 9.16828 | 9.64768        | 10.132               | 9.7715                     | 11.43472                    |
|                     | 9.953755      | 13.3317 | 9.425665       | 11.85374             | 10.10445                   | 8.064325                    |
|                     | 9.63323       | 10.9463 | 8.93133        | 12.69284             | 10.53676                   | 11.23378                    |
|                     | 9.52803       | 9.16405 | 9.34577        | 13.90738             |                            |                             |
|                     | 10.30629      | 9.90041 | 7.994845       | 12.18015             |                            |                             |

|                                  | EXPERIMENT 1 | EXPERIMENT 2 | EXPERIMENT 3 | COMBINED<br>(with pooled SD) |
|----------------------------------|--------------|--------------|--------------|------------------------------|
| <b>uninfected-WT</b>             |              |              |              |                              |
| N                                | 5            | 6            | 6            | 17                           |
| mean                             | 10.8         | 8.68         | 9.73         | 9.674117647                  |
| SD                               | 0.832        | 1.03         | 0.356        | 0.732714286                  |
| <b>Mm-WT</b>                     |              |              |              |                              |
| N                                | 5            | 6            | 6            | 17                           |
| mean                             | 11.78        | 9.23         | 10.74        | 10.51294118                  |
| SD                               | 1.087        | 0.5086       | 1.661        | 1.085428571                  |
| <b>uninfected-TNF</b>            |              |              |              |                              |
| N                                | 5            | 6            | 6            | 17                           |
| mean                             | 9.805        | 9.117        | 9.325        | 9.392764706                  |
| SD                               | 1.14         | 0.5576       | 0.8572       | 0.831                        |
| <b>Mm-TNF<sup>hi</sup></b>       |              |              |              |                              |
| N                                | 5            | 6            | 6            | 17                           |
| mean                             | 12.8         | 11.33        | 12.08        | 12.02705882                  |
| SD                               | 1.891        | 1.44         | 1.243        | 1.4985                       |
| <b>Mm-TNF<sup>hi</sup>-GPNA</b>  |              |              |              |                              |
| N                                | 5            | 3            | 4            | 12                           |
| mean                             | 9.478        | 8.231        | 10.18        | 9.40025                      |
| SD                               | 0.8283       | 0.4722       | 0.3223       | 0.5805                       |
| <b>Mm-TNF<sup>hi</sup>-BPTES</b> |              |              |              |                              |
| N                                | 5            | 4            | 4            | 13                           |
| mean                             | 8.986        | 10.95        | 10.17        | 9.954615385                  |
| SD                               | 0.6792       | 1.057        | 1.551        | 1.05408                      |

|                     | uninfected-WT-TNF <sup>hi</sup> | Mm-WT-TNF <sup>hi</sup> | Mm-RIP3 mo-TNF <sup>hi</sup> | Mm-PGAM5 mo-TNF <sup>hi</sup> |
|---------------------|---------------------------------|-------------------------|------------------------------|-------------------------------|
| <b>EXPERIMENT 1</b> | 8.32489811                      | 9.4561594               | 7.75383391                   | 8.53134                       |
|                     | 9.220129                        | 10.1714924              | 7.62524815                   | 7.60957                       |
|                     | 8.0947494                       | 9.222644                | 8.492279                     | 7.42046                       |
|                     | 8.0255603                       | 10.757272               | 8.42630054                   | 8.83444                       |
|                     | 7.4381754                       | 9.78669832              | 8.33939946                   | 8.18587                       |
|                     | 7.42469075                      | 11.0531316              | 8.84089999                   | 8.49575                       |
| <b>EXPERIMENT 2</b> | 7.42881553                      | 11.6159017              | 9.1216251                    | 8.45264                       |
|                     | 8.48136285                      | 9.9865356               | 8.5747611                    | 8.54323                       |
|                     | 8.15280383                      | 10.7075206              | 9.0975498                    | 8.12821                       |
|                     | 8.39264242                      | 10.9007516              | 8.9212862                    | 8.49751                       |
|                     | 7.62696943                      | 11.5066377              | 7.7993937                    | 7.9872                        |
|                     |                                 |                         | 8.6476334                    | 8.99449                       |

|                                       | <b>EXPERIMENT 1</b> | <b>EXPERIMENT 2</b> | <b>COMBINED</b><br>(with pooled SD) |
|---------------------------------------|---------------------|---------------------|-------------------------------------|
| <b>uninfected-WT-TNF<sup>hi</sup></b> |                     |                     |                                     |
| N                                     | 6                   | 5                   | 11                                  |
| mean                                  | 8.088               | 8.017               | 8.055727273                         |
| SD                                    | 0.6639              | 0.4672              | 0.576477778                         |
| <b>Mm-WT-TNF<sup>hi</sup></b>         |                     |                     |                                     |
| N                                     | 6                   | 5                   | 11                                  |
| mean                                  | 10.07               | 10.94               | 10.46545455                         |
| SD                                    | 0.7244              | 0.66                | 0.695777778                         |
| <b>Mm-RIP3 mo-TNF<sup>hi</sup></b>    |                     |                     |                                     |
| N                                     | 6                   | 6                   | 12                                  |
| mean                                  | 8.246               | 8.694               | 8.47                                |
| SD                                    | 0.4655              | 0.4928              | 0.47915                             |
| <b>Mm-PGAM5 mo-TNF<sup>hi</sup></b>   |                     |                     |                                     |
| N                                     | 6                   | 6                   | 12                                  |
| mean                                  | 8.18                | 8.434               | 8.307                               |
| SD                                    | 0.5575              | 0.3532              | 0.45535                             |
